# Supplementary material
Source: MDPI journal article supplement (https://www.mdpi.com/2673-9801/2/4/29)
Supplement: s1 [file s1]

# **Effect of $\beta$ -cyclodextrin addition on the aqueous extraction of antioxidant polyphenols from peppermint (*Mentha piperita*)**

**Vassilis Athanasiadis, Dimitris Palaogiannis, Eleni Bozinou, Stavros I. Lalas,  
Dimitris P. Makris**

Department of Food Science & Nutrition, School of Agricultural Sciences, University of Thessaly,  
N. Temponera Street, Karditsa - 43100, GREECE

\* D.P. Makris; email: [dimitrismakris@uth.gr](mailto:dimitrismakris@uth.gr); tel: +30 24410 64792

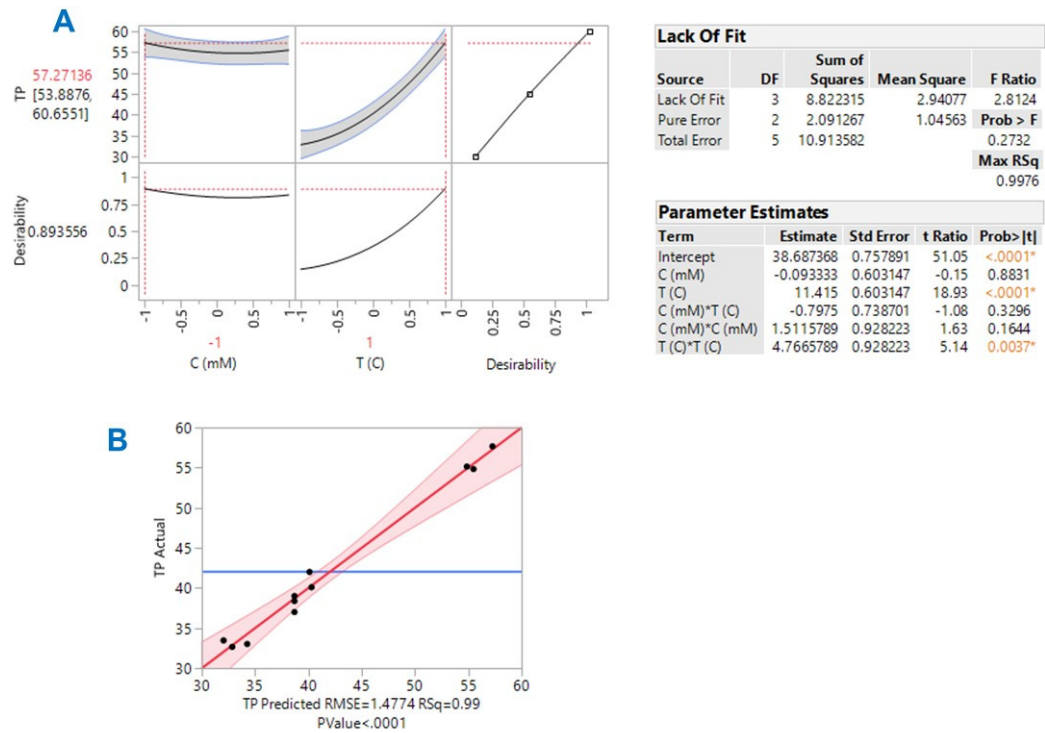

**Figure S1.** Desirability function (graph A), and plot of predicted vs actual values of the response ( $Y_{TP}$ ) (plot B), for the optimization of the extraction of *M. piperita* polyphenols performed with  $\beta$ -CD. Inset tables provide statistics associated with the assessment of the model derived. Values with color and asterisk are statistically significant.

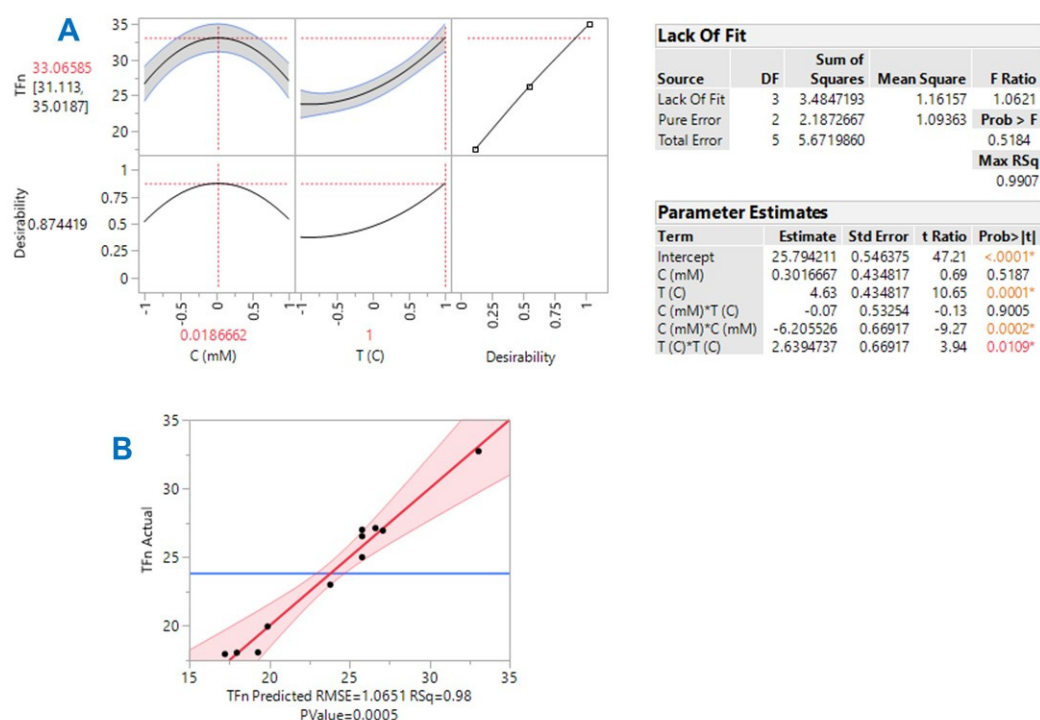

**Figure S2.** Desirability function (graph A), and plot of predicted vs actual values of the response ( $Y_{TFn}$ ) (plot B), for the optimization of the extraction of *M. piperita* polyphenols performed with  $\beta$ -CD. Inset tables provide statistics associated with the assessment of the model derived. Values with color and asterisk are statistically significant.

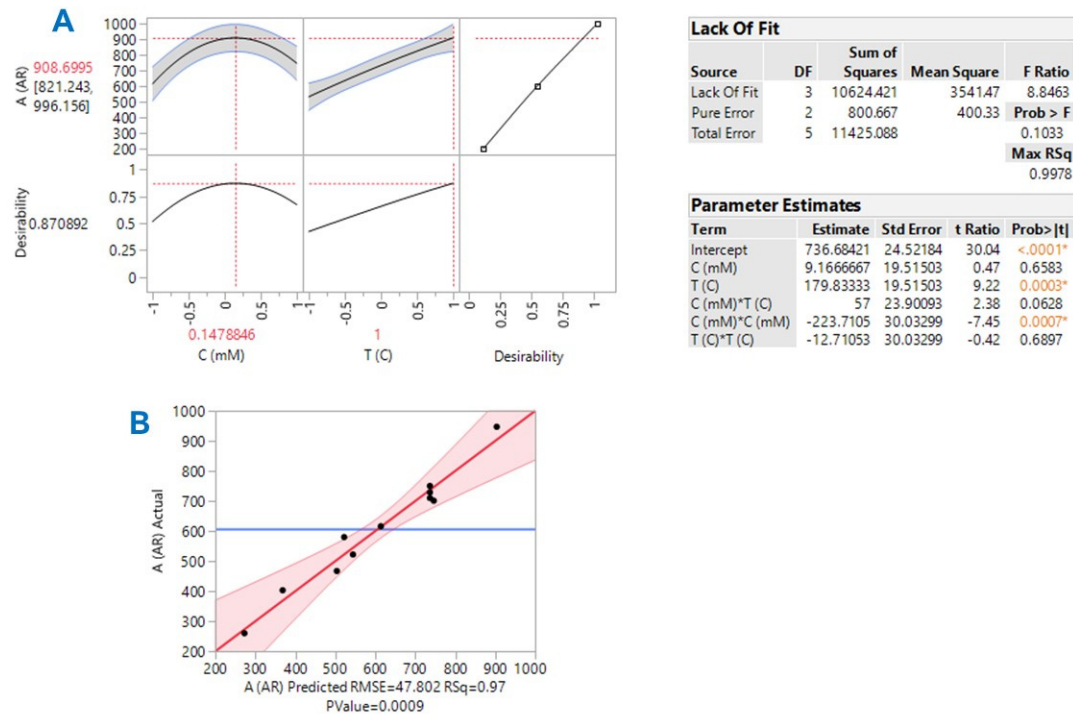

**Figure S3.** Desirability function (graph A), and plot of predicted vs actual values of the response ( $A_{AR}$ ) (plot B), for the optimization of the extraction of *M. piperita* polyphenols performed with  $\beta$ -CD. Inset tables provide statistics associated with the assessment of the model derived. Values with color and asterisk are statistically significant.

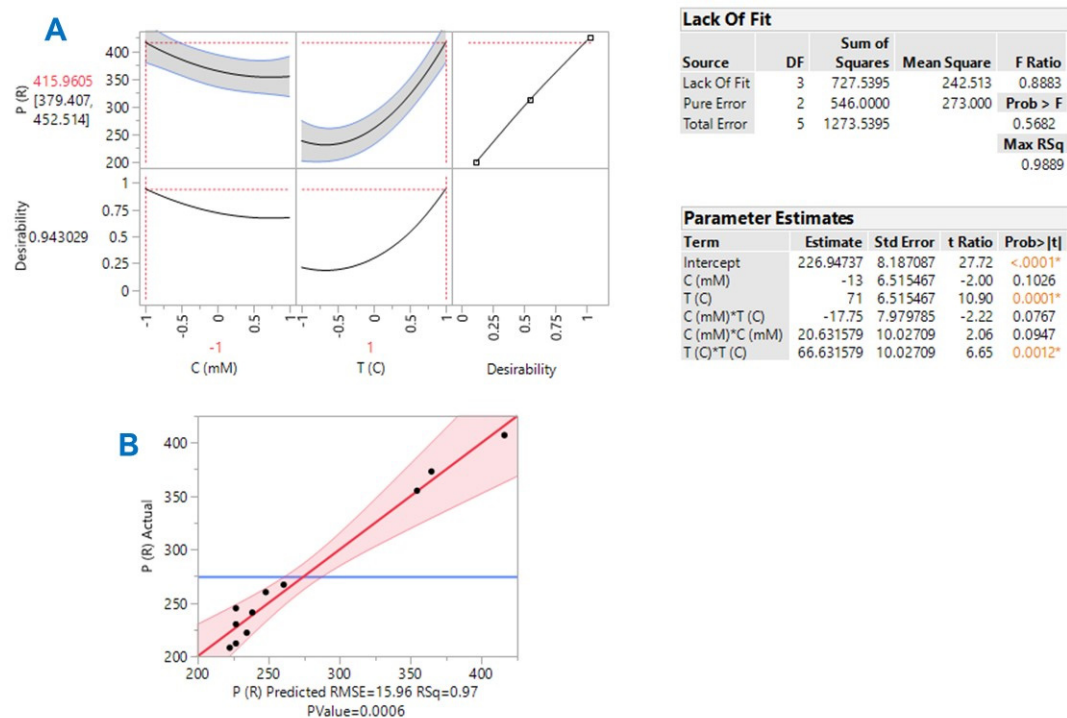

**Figure S4.** Desirability function (graph A), and plot of predicted vs actual values of the response ( $P_R$ ) (plot B), for the optimization of the extraction of *M. piperita* polyphenols performed with  $\beta$ -CD. Inset tables provide statistics associated with the assessment of the model derived. Values with color and asterisk are statistically significant.
